# Supplementary material for: Single nanoparticle plasmonic spectroscopy for study of the efflux function of multidrug ABC membrane transporters of single live cells
Source: Royal Society of Chemistry journal article supplement (doi:10.1039/c6ra05895g), 2016-01-01
Supplement: c6ra05895g1.pdf [file c6ra05895g1.pdf]

## On-Line Supporting Information

### Single Nanoparticle Plasmonic Spectroscopy for Study of Efflux Function of Multidrug ABC Membrane Transporters of Single Live Cells

Lauren M. Browning,<sup>1</sup> Kerry J. Lee,<sup>1</sup> Pavan K. Cherukuri,<sup>1</sup> Prakash D. Nallathamby,<sup>1</sup> Seth Warren,<sup>1</sup> Jean-Michel Jault,<sup>2</sup> and Xiao-Hong Nancy Xu\*<sup>1</sup>

<sup>1</sup>*Department of Chemistry and Biochemistry, Old Dominion University, Norfolk, VA 23529, USA*

<sup>2</sup>*UMR5086 CNRS/UCBLyon I, MMSB-IBCP, 7 Passage du Vercors 69367 Lyon cedex 07,  
France*

---

\* To whom correspondence should be addressed: Email: [xhxu@odu.edu](mailto:xhxu@odu.edu); [www.odu.edu/sci/xu/xu.htm](http://www.odu.edu/sci/xu/xu.htm); Tel/fax: (757) 683-5698

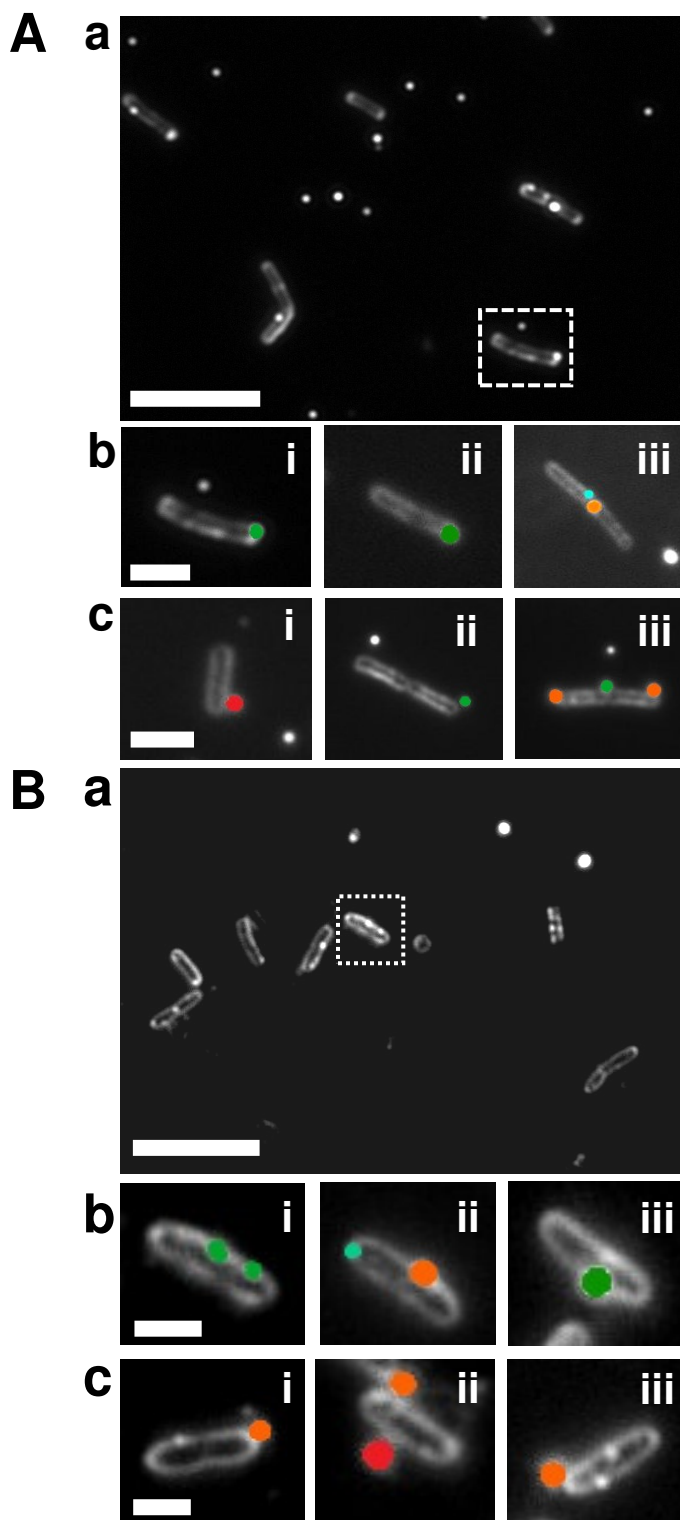

**Figure S1:** Imaging of single intracellular and extracellular Ag NPs in single live cells using DFOMS. **(A)** Ct-BmrA-EGFP and **(B)**  $\Delta$ BmrA cells incubated with 3.7 pM Ag NPs: **(a)** representative images of individual cells and **(b-c)** Zoomed-in images of single cells show (b) intracellular and (c) extracellular NPs. The plasmonic colors of the NPs in (b-c) were characterized using their LSPR spectra and their pseudo colors were added into the images based upon their spectra. The scale bar is 6  $\mu$ m in (A) and 2  $\mu$ m in (B).
